# Supplementary material for: Plant-to-Plant Variability in Root Metabolite Profiles of 19 Arabidopsis thaliana Accessions Is Substance-Class-Dependent
Source: MDPI journal article supplement (doi:10.3390/ijms17091565), 2016-09-16
Supplement: s1 [file s1]

# Supplementary Materials: Plant-to-Plant Variability in Root Metabolite Profiles of 19 *Arabidopsis thaliana* Accessions Is Substance-Class-Dependent

Susann Mönchgesang, Nadine Strehmel, Diana Trutschel, Lore Westphal, Steffen Neumann and Dierk Scheel

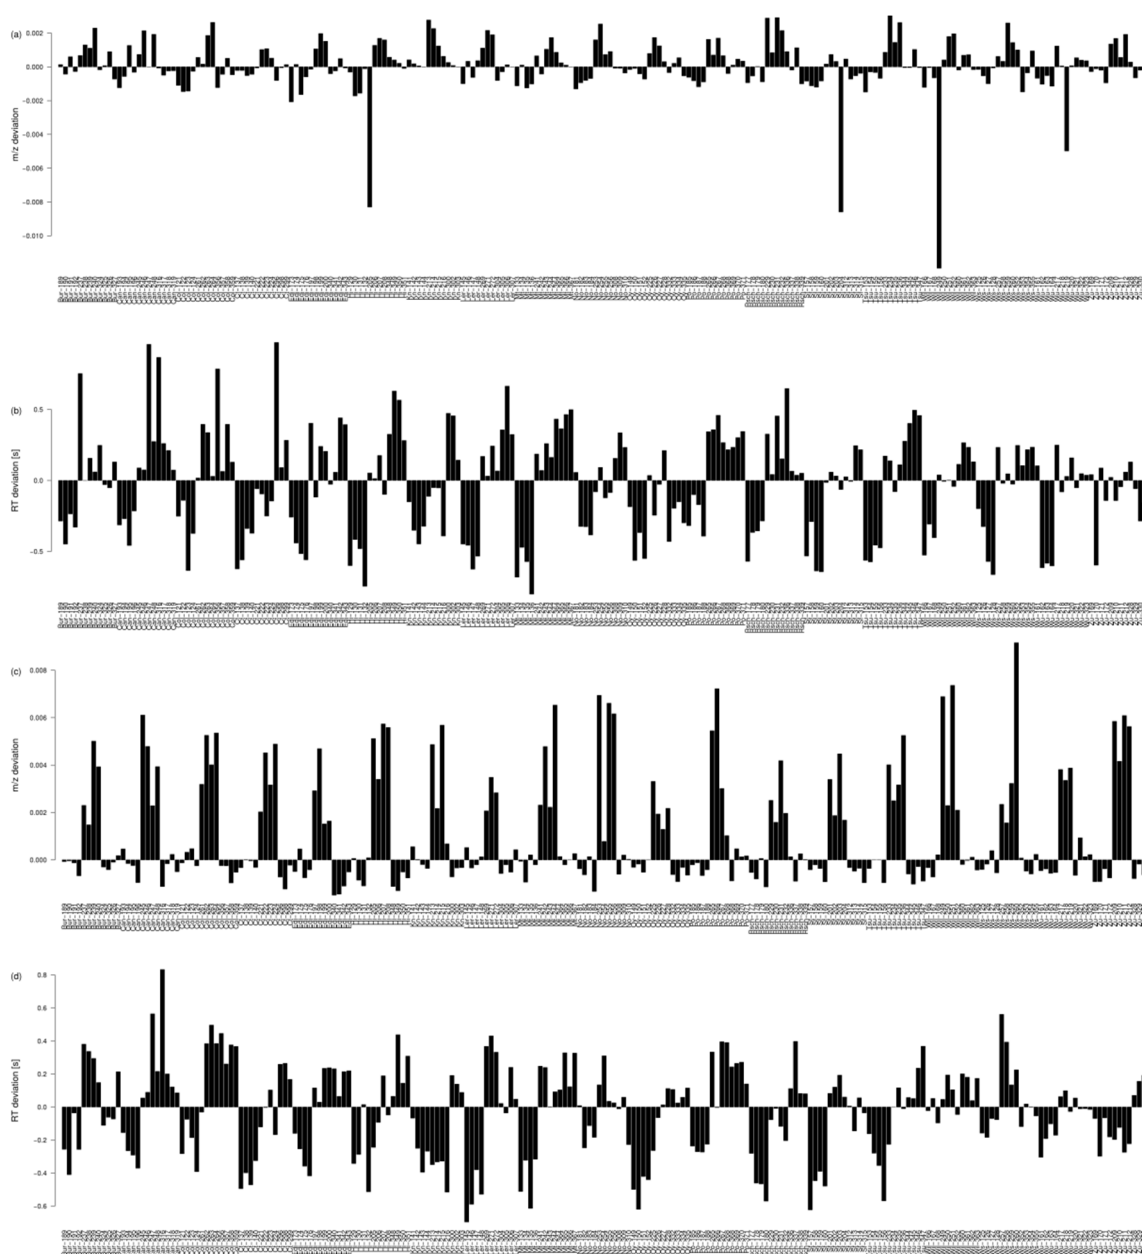

**Figure S1.** Quality control of liquid chromatography (LC)/electrospray ionization (ESI)(-) and ESI(+) mass spectrometry (MS) data sets. Deviation of each single plant sample in chromatography and mass analyzer, (a) mass-to-charge ( $m/z$ ) deviation ESI(-); (b) retention time (RT) deviation ESI(-); (c)  $m/z$  deviation ESI(+); (d) RT deviation ESI(+).

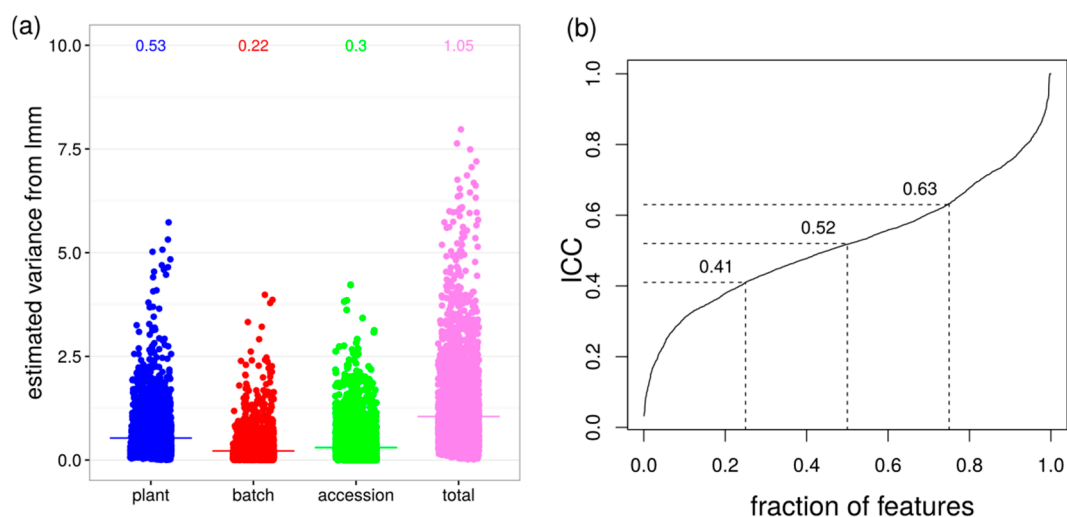

**Figure S2.** Variance decomposition of LC/ESI(+) MS data set. (a) Variances for plant, batch and accession were estimated with a linear mixed model (lmm), dot—variance of one feature, bar and number—mean variance over 3305 features; (b) Cumulative intraclass correlation (ICC) distribution for all features ( $\sigma^2_{\text{plant}}/\sigma^2_{\text{total}}$ ), dotted lines indicate 25%, 50% and 75% quantiles.

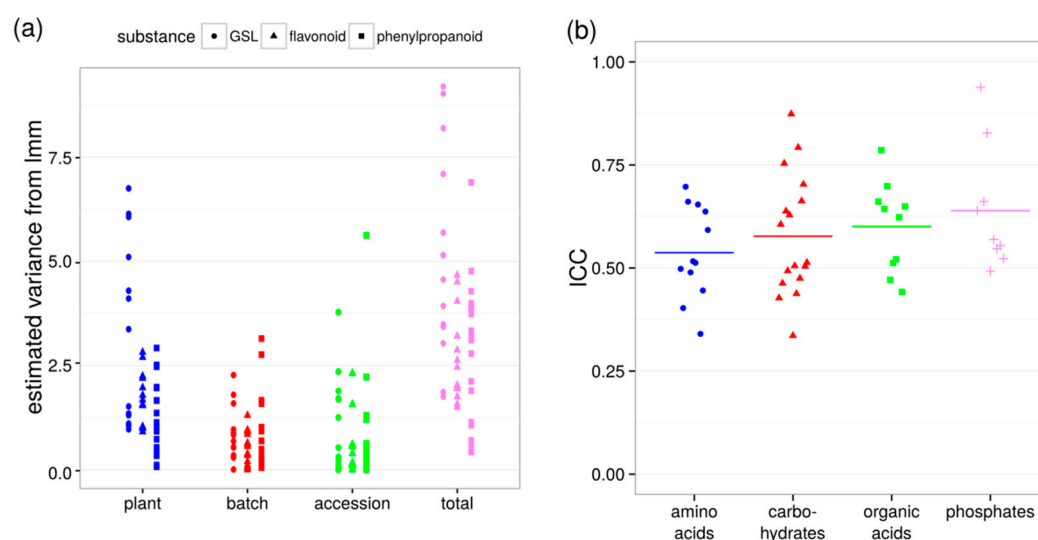

**Figure S3.** Biological variability of annotated primary metabolites. (a) Variances for plant, batch and accession were estimated with a linear mixed model (lmm), dot—variance of one metabolite; (b) ICCs for carbohydrates, organic acids, amino acids and phosphates, dot—ICC of one metabolite, bar—mean ICC for substance class. GSL = glucosinolate.

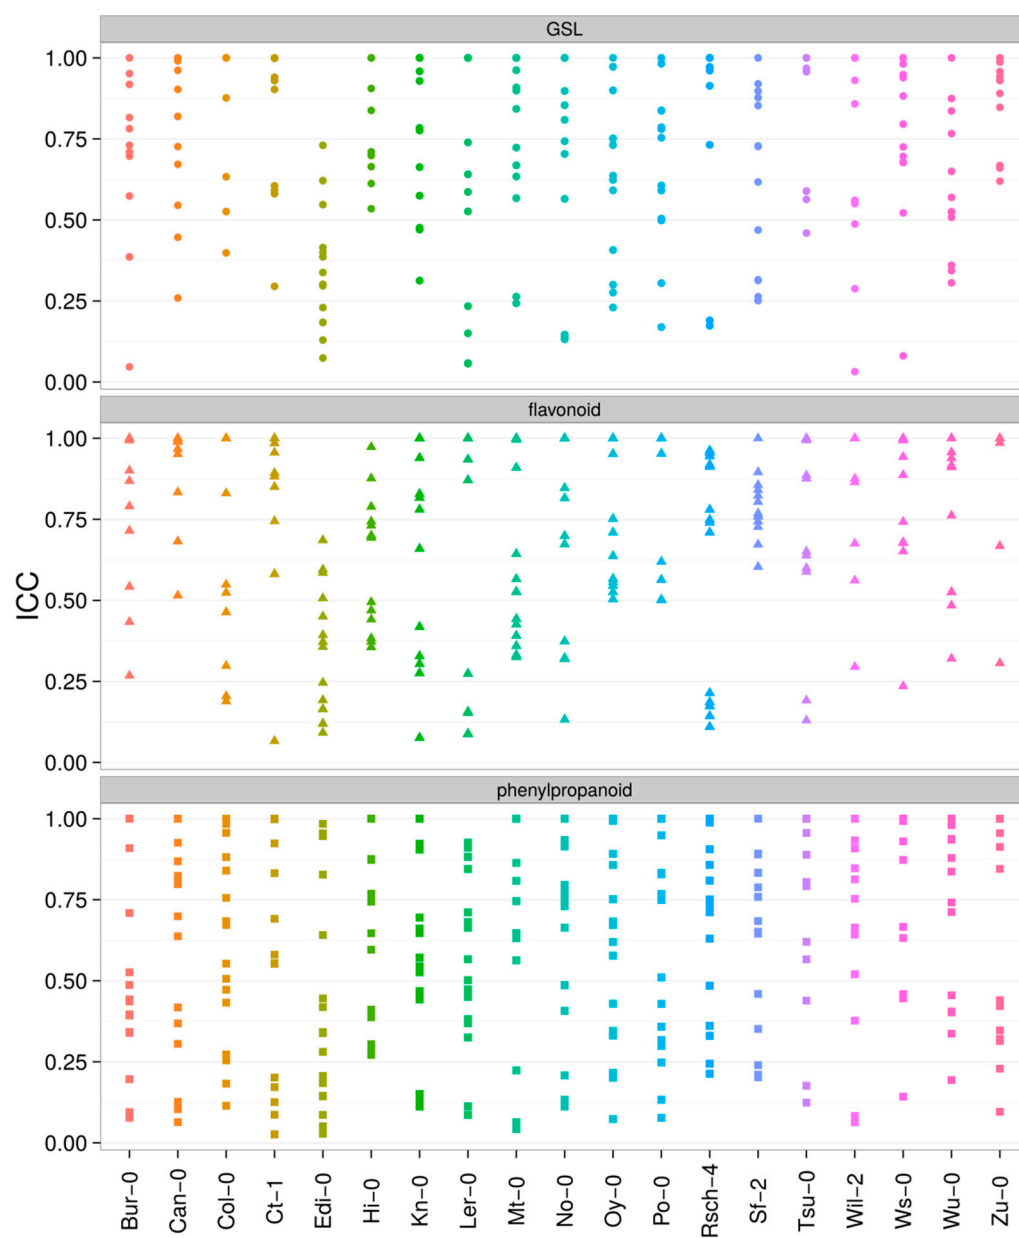

**Figure S4.** Accession-specific ICCs of secondary metabolites. ICCs were determined as  $\sigma^2_{\text{plant}}/\sigma^2_{\text{total}}$  from 19 linear mixed models. GSL = glucosinolate.

**Table S1.** Estimated variances for accession, experiment and plant from a linear mixed model and intraclass correlation (ICC) for each secondary metabolite and the mean for each substance class (bold). GSL = glucosinolate, MeS = methylthio, MeSO = methylsulfinyl.

| <b>Metabolite</b>                        | <b><math>\sigma^2_{\text{plant}}</math></b> | <b><math>\sigma^2_{\text{batch}}</math></b> | <b><math>\sigma^2_{\text{accession}}</math></b> | <b><math>\sigma^2_{\text{total}}</math></b> | <b>ICC</b> |
|------------------------------------------|---------------------------------------------|---------------------------------------------|-------------------------------------------------|---------------------------------------------|------------|
| 3-MeS-Propyl-GSL                         | 1.108                                       | 0.348                                       | 0.301                                           | 1.757                                       | 0.631      |
| 4-MeS-Butyl-GSL                          | 1.054                                       | 0.293                                       | 1.688                                           | 3.035                                       | 0.347      |
| 5-MeS-Pentyl-GSL                         | 1.351                                       | 0.866                                       | 1.712                                           | 3.929                                       | 0.344      |
| 4-MeSO-Butyl-GSL                         | 1.075                                       | 0.967                                       | 1.890                                           | 3.932                                       | 0.273      |
| 5-MeSO-Heptyl-GSL                        | 1.519                                       | 0.687                                       | 2.356                                           | 4.563                                       | 0.333      |
| 6-MeSO-Hexyl-GSL                         | 1.307                                       | 1.592                                       | 0.532                                           | 3.431                                       | 0.381      |
| 7-MeS-Heptyl-GSL                         | 6.139                                       | 1.799                                       | 1.256                                           | 9.194                                       | 0.668      |
| 7-MeSO-Heptyl-GSL                        | 4.296                                       | 0.549                                       | 0.305                                           | 5.150                                       | 0.834      |
| 8-MeS-Octyl-GSL                          | 6.751                                       | 2.273                                       | 0.000                                           | 9.024                                       | 0.748      |
| 8-MeSO-Octyl-GSL                         | 5.106                                       | 0.533                                       | 0.052                                           | 5.691                                       | 0.897      |
| 1-MeO-I3M-GSL                            | 4.109                                       | 0.305                                       | 3.781                                           | 8.196                                       | 0.501      |
| 4-MeO-I3M-GSL                            | 3.374                                       | 0.009                                       | 0.110                                           | 3.492                                       | 0.966      |
| I3M-GSL                                  | 6.065                                       | 0.836                                       | 0.194                                           | 7.096                                       | 0.855      |
| 6-MeS-Hexyl-GSL                          | 0.972                                       | 0.892                                       | 0.000                                           | 1.864                                       | 0.522      |
| Quercetin-3-O-Deoxyhex-Hex-7-O-Deoxyhex  | 2.245                                       | 0.852                                       | 1.572                                           | 4.669                                       | 0.481      |
| Kaempferol-(Deoxyhex) <sub>2</sub>       | 1.677                                       | 0.197                                       | 0.157                                           | 2.031                                       | 0.826      |
| Kaempferol-(Deoxyhex) <sub>2</sub> Hex a | 1.540                                       | 0.047                                       | 0.388                                           | 1.975                                       | 0.780      |
| Kaempferol-(Deoxyhex) <sub>2</sub> Hex b | 2.821                                       | 0.611                                       | 0.610                                           | 4.042                                       | 0.698      |
| Kaempferol-(Hex) <sub>2</sub>            | 0.992                                       | 0.956                                       | 0.000                                           | 1.948                                       | 0.509      |
| Kaempferol-DeoxyhexHex a                 | 0.911                                       | 0.110                                       | 0.554                                           | 1.575                                       | 0.578      |
| Kaempferol-DeoxyhexHex b                 | 1.788                                       | 0.560                                       | 0.115                                           | 2.463                                       | 0.726      |
| Kaempferol-Deoxyhex a                    | 1.024                                       | 0.921                                       | 0.002                                           | 1.946                                       | 0.526      |
| Kaempferol-Hex                           | 1.038                                       | 0.915                                       | 0.000                                           | 1.953                                       | 0.531      |
| Naringenin-Hex                           | 0.990                                       | 0.384                                       | 0.124                                           | 1.497                                       | 0.661      |
| Quercetin-(Deoxyhex) <sub>2</sub> Hex a  | 2.697                                       | 0.343                                       | 0.167                                           | 3.208                                       | 0.841      |
| Quercetin-(Deoxyhex) <sub>2</sub> Hex b  | 2.194                                       | 0.000                                       | 2.314                                           | 4.508                                       | 0.487      |
| Quercetin-(Hex) <sub>2</sub>             | 1.014                                       | 0.642                                       | 0.096                                           | 1.752                                       | 0.579      |
| Quercetin-DeoxyhexHex a                  | 1.568                                       | 1.305                                       | 0.000                                           | 2.872                                       | 0.546      |
| Quercetin-DeoxyhexHex b                  | 1.970                                       | 0.061                                       | 0.593                                           | 2.624                                       | 0.751      |
| Coniferin                                | 0.364                                       | 0.228                                       | 0.111                                           | 0.703                                       | 0.518      |
| Syringin                                 | 0.337                                       | 0.226                                       | 0.576                                           | 1.139                                       | 0.296      |
| S(8-8)S                                  | 1.658                                       | 1.584                                       | 0.000                                           | 3.242                                       | 0.511      |
| Lariciresinol                            | 1.981                                       | 0.926                                       | 0.428                                           | 3.335                                       | 0.594      |
| Lariciresinol-Hex                        | 1.961                                       | 0.267                                       | 0.556                                           | 2.785                                       | 0.704      |
| Esculetin                                | 2.472                                       | 1.666                                       | 0.628                                           | 4.766                                       | 0.519      |
| Scopoletin                               | 1.036                                       | 0.493                                       | 0.591                                           | 2.119                                       | 0.489      |
| Esculin                                  | 0.732                                       | 0.114                                       | 0.223                                           | 1.068                                       | 0.685      |
| Scopolin                                 | 1.663                                       | 1.020                                       | 1.210                                           | 3.893                                       | 0.427      |
| Scopoletin Hex-Pent                      | 0.071                                       | 0.051                                       | 0.300                                           | 0.423                                       | 0.168      |
| Scopoletin Benzoyl-Hex-Pent              | 0.111                                       | 0.113                                       | 0.334                                           | 0.558                                       | 0.199      |
| Unknown oligolignol                      | 2.920                                       | 0.691                                       | 0.380                                           | 3.991                                       | 0.732      |
| G(8-O-4)FA-Sulfate                       | 0.922                                       | 0.347                                       | 5.623                                           | 6.892                                       | 0.134      |
| G(8-5)FA                                 | 1.362                                       | 0.696                                       | 2.225                                           | 4.283                                       | 0.318      |
| G(8-5)FA-Sulfate                         | 0.536                                       | 0.057                                       | 1.302                                           | 1.895                                       | 0.283      |
| G-Hex                                    | 2.514                                       | 0.144                                       | 0.449                                           | 3.106                                       | 0.809      |
| Coniferyl alcohol(8-O-4)sinapoylmalate   | 1.134                                       | 2.762                                       | 0.000                                           | 3.896                                       | 0.291      |
| 1-O-Sinapoyl-beta-glucose                | 0.502                                       | 3.148                                       | 0.085                                           | 3.735                                       | 0.134      |

**Table S1.** *Cont.*

| <b>Metabolite</b>       | <b><math>\sigma^2_{\text{plant}}</math></b> | <b><math>\sigma^2_{\text{batch}}</math></b> | <b><math>\sigma^2_{\text{accession}}</math></b> | <b><math>\sigma^2_{\text{total}}</math></b> | <b>ICC</b> |
|-------------------------|---------------------------------------------|---------------------------------------------|-------------------------------------------------|---------------------------------------------|------------|
| <b>GSLs</b>             | 3.159                                       | 0.853                                       | 1.013                                           | 5.025                                       | 0.593      |
| <b>Flavonoids</b>       | 1.631                                       | 0.527                                       | 0.446                                           | 2.604                                       | 0.635      |
| <b>Phenylpropanoids</b> | 1.238                                       | 0.807                                       | 0.834                                           | 2.879                                       | 0.434      |

**Table S2.** Estimated variances for accession, experiment and plant from a linear mixed model and ICC for each primary metabolite and the mean for each substance class (bold). TMS = trimethylsilylated, MEOX = methoxymated, MP = main product, BP = by-product, GABA =  $\gamma$ -aminobutyric acid.

| Metabolite                                                 | $\sigma^2_{\text{plant}}$ | $\sigma^2_{\text{batch}}$ | $\sigma^2_{\text{accession}}$ | $\sigma^2_{\text{total}}$ | ICC   |
|------------------------------------------------------------|---------------------------|---------------------------|-------------------------------|---------------------------|-------|
| A122001_Valine-2TMS                                        | 0.063                     | 0.043                     | 0.020                         | 0.127                     | 0.498 |
| A129002_Leucine-2TMS                                       | 0.086                     | 0.084                     | 0.006                         | 0.176                     | 0.489 |
| A133001_Glycine-3TMS                                       | 0.151                     | 0.108                     | 0.033                         | 0.293                     | 0.516 |
| A138001_Serine-3TMS                                        | 0.140                     | 0.094                     | 0.039                         | 0.273                     | 0.513 |
| A138005_Alanine-3-cyano-2TMS                               | 0.263                     | 0.079                     | 0.060                         | 0.403                     | 0.654 |
| GABA-2TMS                                                  | 0.033                     | 0.017                     | 0.046                         | 0.096                     | 0.340 |
| A140001_Threonine-3TMS                                     | 0.158                     | 0.140                     | 0.056                         | 0.354                     | 0.445 |
| A144003_Aspartic acid-2TMS                                 | 0.132                     | 0.075                     | 0.000                         | 0.208                     | 0.637 |
| A144001_beta-Alanine-3TMS                                  | 0.162                     | 0.096                     | 0.016                         | 0.273                     | 0.592 |
| A153002_Pyroglutamic acid-2TMS                             | 0.228                     | 0.243                     | 0.095                         | 0.567                     | 0.403 |
| A163001_Glutamic acid-3TMS                                 | 0.515                     | 0.152                     | 0.071                         | 0.739                     | 0.697 |
| A164001_Phénylalanine-2TMS                                 | 0.677                     | 0.347                     | 0.000                         | 1.024                     | 0.661 |
| D(-)-Erythrose-tris(trimethylsilyl)ether,methyloxime (syn) | 0.157                     | 0.048                     | 0.263                         | 0.467                     | 0.336 |
| A154001_Erythronic acid-4TMS                               | 0.047                     | 0.030                     | 0.017                         | 0.093                     | 0.505 |
| Arabinonic acid lactone-3TMS                               | 0.033                     | 0.033                     | 0.010                         | 0.076                     | 0.438 |
| A165001_Xylose-1MEOX-4TMS-MP                               | 0.136                     | 0.036                     | 0.000                         | 0.171                     | 0.792 |
| A177001_Ribonic acid-5TMS                                  | 0.080                     | 0.057                     | 0.031                         | 0.168                     | 0.475 |
| A179001_Arabinonic acid-5TMS                               | 0.259                     | 0.097                     | 0.034                         | 0.391                     | 0.663 |
| Talofuranose-5TMS                                          | 0.054                     | 0.023                     | 0.000                         | 0.077                     | 0.703 |
| A187002_Fructose-1MEOX-5TMS-MP                             | 0.082                     | 0.080                     | 0.000                         | 0.162                     | 0.504 |
| A188004_Fructose-1MEOX-5TMS-BP                             | 0.113                     | 0.107                     | 0.000                         | 0.219                     | 0.513 |
| A188006_Glucopyranoside-1-O-methyl-alpha-4TMS              | 0.072                     | 0.093                     | 0.003                         | 0.168                     | 0.427 |
| A189002_Glucose-1MEOX-5TMS-MP                              | 0.009                     | 0.005                     | 0.000                         | 0.015                     | 0.606 |
| A191001_Glucose-1MEOX-5TMS-BP                              | 0.107                     | 0.115                     | 0.009                         | 0.230                     | 0.463 |
| A19900_Galactonic acid-6TMS                                | 0.067                     | 0.020                     | 0.002                         | 0.089                     | 0.754 |
| A200001_Gluconic acid-6TMS                                 | 0.242                     | 0.137                     | 0.000                         | 0.379                     | 0.638 |
| A207012_Glucosamine-N-acetyl-1MEOX-4TMS                    | 0.117                     | 0.067                     | 0.054                         | 0.237                     | 0.493 |
| A264001_Sucrose-8TMS                                       | 0.027                     | 0.016                     | 0.000                         | 0.043                     | 0.629 |
| A274001_Maltose-1MEOX-8TMS-MP                              | 0.359                     | 0.052                     | 0.000                         | 0.410                     | 0.874 |
| A105001_Lactic acid-2TMS                                   | 0.109                     | 0.030                     | 0.000                         | 0.139                     | 0.786 |
| A135003_Glyceric acid-3TMS                                 | 0.907                     | 0.278                     | 0.225                         | 1.409                     | 0.643 |
| Methylsuccinic acid-2TMS                                   | 0.069                     | 0.012                     | 0.018                         | 0.099                     | 0.699 |
| A149001_Malic acid-3TMS                                    | 0.138                     | 0.125                     | 0.029                         | 0.292                     | 0.471 |
| A156001_Threonic acid-4TMS                                 | 0.117                     | 0.081                     | 0.031                         | 0.228                     | 0.512 |
| A158004_Glutaric acid-2-oxo-1MEOX-2TMS-MP                  | 0.187                     | 0.143                     | 0.029                         | 0.359                     | 0.521 |
| A161003_Glutaric acid-3-hydroxy-3-methyl-3TMS              | 0.459                     | 0.271                     | 0.006                         | 0.736                     | 0.623 |
| A182004_Citric acid-4TMS                                   | 0.185                     | 0.152                     | 0.081                         | 0.419                     | 0.442 |
| A205001_Hexadecanoic acid-1TMS                             | 0.016                     | 0.009                     | 0.000                         | 0.025                     | 0.649 |
| A225002-Octadecanoic acid-1TMS                             | 0.019                     | 0.010                     | 0.000                         | 0.028                     | 0.661 |
| A119001_Phosphoric acid monomethyl ester-2TMS              | 0.049                     | 0.028                     | 0.000                         | 0.077                     | 0.639 |
| A129001_Phosphoric acid-3TMS                               | 0.001                     | 0.000                     | 0.000                         | 0.001                     | 0.938 |
| A177002_Glycerol-3-phosphate-4TMS                          | 0.129                     | 0.066                     | 0.000                         | 0.195                     | 0.661 |
| A177014_Ethanolaminephosphate-4TMS                         | 0.425                     | 0.026                     | 0.063                         | 0.513                     | 0.827 |
| A218002_Glycerophosphoglycerol-5TMS                        | 0.135                     | 0.068                     | 0.072                         | 0.275                     | 0.492 |
| A233002_Glucose-6-phosphate-1MEOX-6TMS-MP                  | 0.120                     | 0.090                     | 0.001                         | 0.210                     | 0.569 |
| A235002_Glucose-6-phosphate-1MEOX-6TMS-BP                  | 0.115                     | 0.088                     | 0.007                         | 0.211                     | 0.547 |
| A243001_myo-Inositol-1-phosphate-7TMS                      | 0.051                     | 0.038                     | 0.003                         | 0.092                     | 0.555 |
| A249002_Inositol-1-phosphate-my-7TMS                       | 0.043                     | 0.014                     | 0.025                         | 0.081                     | 0.523 |
| A177002_Glycerol-3-phosphate-4TMS                          | 0.129                     | 0.066                     | 0.000                         | 0.195                     | 0.661 |
| A177014_Ethanolaminephosphate-4TMS                         | 0.425                     | 0.026                     | 0.063                         | 0.513                     | 0.827 |
| A218002_Glycerophosphoglycerol-5TMS                        | 0.135                     | 0.068                     | 0.072                         | 0.275                     | 0.492 |
| A233002_Glucose-6-phosphate-1MEOX-6TMS-MP                  | 0.120                     | 0.090                     | 0.001                         | 0.210                     | 0.569 |
| A235002_Glucose-6-phosphate-1MEOX-6TMS-BP                  | 0.115                     | 0.088                     | 0.007                         | 0.211                     | 0.547 |
| <b>Amino acids</b>                                         | 0.217                     | 0.123                     | 0.037                         | 0.378                     | 0.537 |
| <b>Carbohydrates</b>                                       | 0.115                     | 0.060                     | 0.025                         | 0.200                     | 0.577 |
| <b>Organic acid</b>                                        | 0.221                     | 0.111                     | 0.042                         | 0.374                     | 0.601 |
| <b>Phosphates</b>                                          | 0.119                     | 0.046                     | 0.019                         | 0.184                     | 0.639 |
